# Supplementary material for: The Escherichia coli effector EspJ blocks Src kinase activity via amidation and ADP ribosylation
Source: PubMed Central journal article supplement (PMC4284639; doi:10.1038/ncomms6887), 2014-12-19
Supplement: ncomms6887-s1.pdf [file ncomms6887-s1.pdf]

## **Supplementary Materials**

Supplementary Figures 1-11

Supplementary Tables 1-4

Supplementary References

## Supplementary Figures

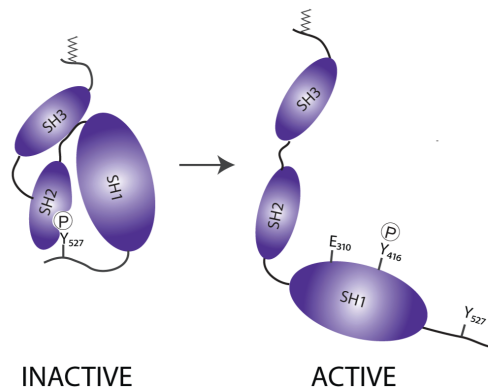

**Supplementary Figure 1. Schematic illustration of the inactive and active conformations of SFKs.** In the inactive state the SH2 and SH3 domains are packed against the catalytic SH1 domain. Phosphorylation of the C-terminal Y527 facilitates this conformation through interaction with the SH2 domain. Dephosphorylation of Y527 and/or competitive interactions of ligands with the SH2 and SH3 domains disrupts this conformation, opening the kinase. Autophosphorylation at Y416 promotes the open conformation and kinase activity. The relative position of E310 is shown.

```

EspJEPEC      MPIIKNCLSSISNILRNEKTSYSLIKTEQTGKLLNRKITTTPTPAKLLSYRNADLIKENY 60
EspJEHEC      MSIIKNCLSLINNALNIQKTSYSLTKMEQAGKLLNRKITPENTPPMLLSYRNADLTQEK 60
AvrPphF      -----MGNICNSGGVSRV-YSPPVSPVYGSVSSPSRFVGGYTLISIHQLSSEERENF 52
              :. * * .:* ** . * .: . : : . :*:
EspJEPEC      ITEK-VLSIFNIKRDFAVRIQSNQFTDLKNTIQGHKDTVAKVIDWYNPQKNAFGIMMG 119
EspJEHEC      ITER-VLSIFNIKRDFAVRIQNNQFTDLKNTIQGHQNTVASVMDWYNPQKNALGITMG 119
AvrPphF      LDAHDPMRVYDLNSETSVYRTTQREY--VRNGYATGNPNSGAIIALHEELQESPYAQHIG 110
              : : : : : : : . * . . : : : * : * : : * : : * : * : * : * : *
EspJEPEC      TPRRSADIAKEESRNALNFMIMEKDTFNEKILNSNANLQKKYGTTESSWVSASVGSLLD 179
EspJEHEC      TPRKSADIAKEEHRNALNFMIMEKNTFHEKILNSNDNLQKYSYKTEDSSWVAASVGSLLD 179
AvrPphF      ARPDQADAYRPRTAHAS---SLNTPSLNVMAGQGALSALRGYAGS-DHVTTEMLGDFLD 166
              : . * * : . : * : : : : : . . : * : : : . : * : * : *
EspJEPEC      KGAKVYPDISCSLRLG---EPFIITLPETVRLDVNIHPLKK 217
EspJEHEC      KGAKVYPTSCSLRLG---EPFIFTLPEVSRVDVDIYPLKK 217
AvrPphF      QGGKVYSDTSAMSAGGDSVEALIVTLPKGRKVPVNILD--- 204
              :*.*.*.*.* * * :*.*.*.* : : * : *

```

**Supplementary Figure 2. Sequence alignment of EspJ with AvrPphF.** EspJ amino acid sequence from EPEC O127:H6 E2348/69 and EHEC O157:H7 (Sakai) aligned with AvrPphF\_ORF2 from *Pseudomonas syringae* pv. *phaseolicola*. R79 and D187 are shown in bold and black. Amino acid color code: Red: small, hydrophobic, aromatic, not Y; Blue: acidic; Magenta: basic; Green: hydroxyl, amine, amide, basic; "\*": identical; ".": conserved substitutions (same colour group); ".": semi-conserved substitution (similar shapes).

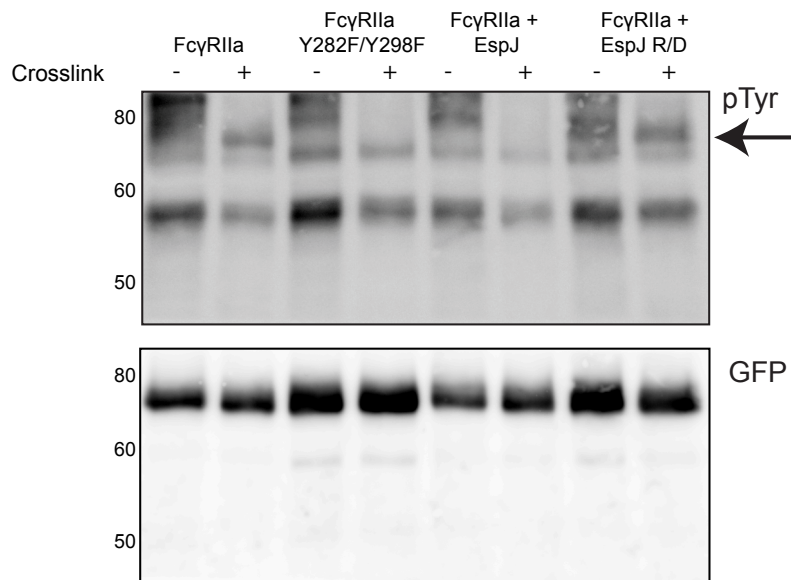

**Supplementary Figure 3. EspJ inhibits FcγRIIa tyrosine phosphorylation.** Full immunoblots corresponding to cropped versions shown in Fig. 2e. Cos-7 cells co-expressing GFP-tagged FcγRIIa or FcγRIIa Y282F/Y298F with EspJ, EspJ-R/D or an empty vector were treated with anti-FcγR IV.3 antibody with or without secondary antibody crosslinking. The FcγRIIa was immunoprecipitated and analyzed by immunoblotting with anti-pTyr and anti-GFP antibodies, which shows phosphorylation of wild type FcγRIIa in the control and EspJ-R/D-expressing cells (arrow) but not in cells expressing EspJ or FcγRIIa Y282F/Y298F. Similar results were obtained in three independent experiments. Representative immunoblots are shown.

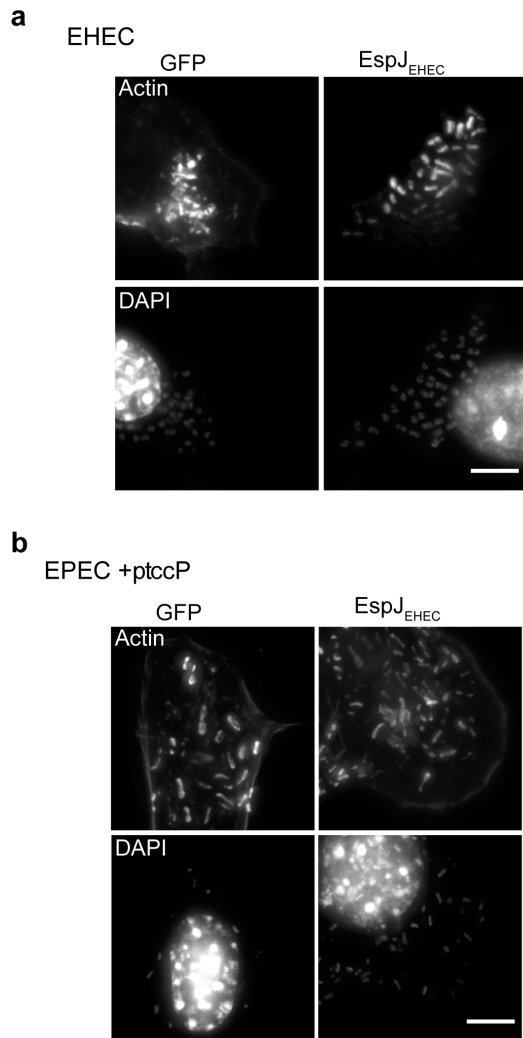

**Supplementary Figure 4. EspJ does not affect EspF<sub>U</sub>/TccP dependent pedestal formation.** Swiss 3T3 cells expressing Flag-tagged GFP or EspJ<sub>EHEC</sub> were infected EHEC 85-170 (**a**) or EPEC E2348/69 expressing TccP from a plasmid (**b**). Cells were stained with Phalloidin for actin visualization and DAPI to detect bacteria. Representative images are shown. Similar results observed in two independent experiments. Scale bar indicates 10μm.

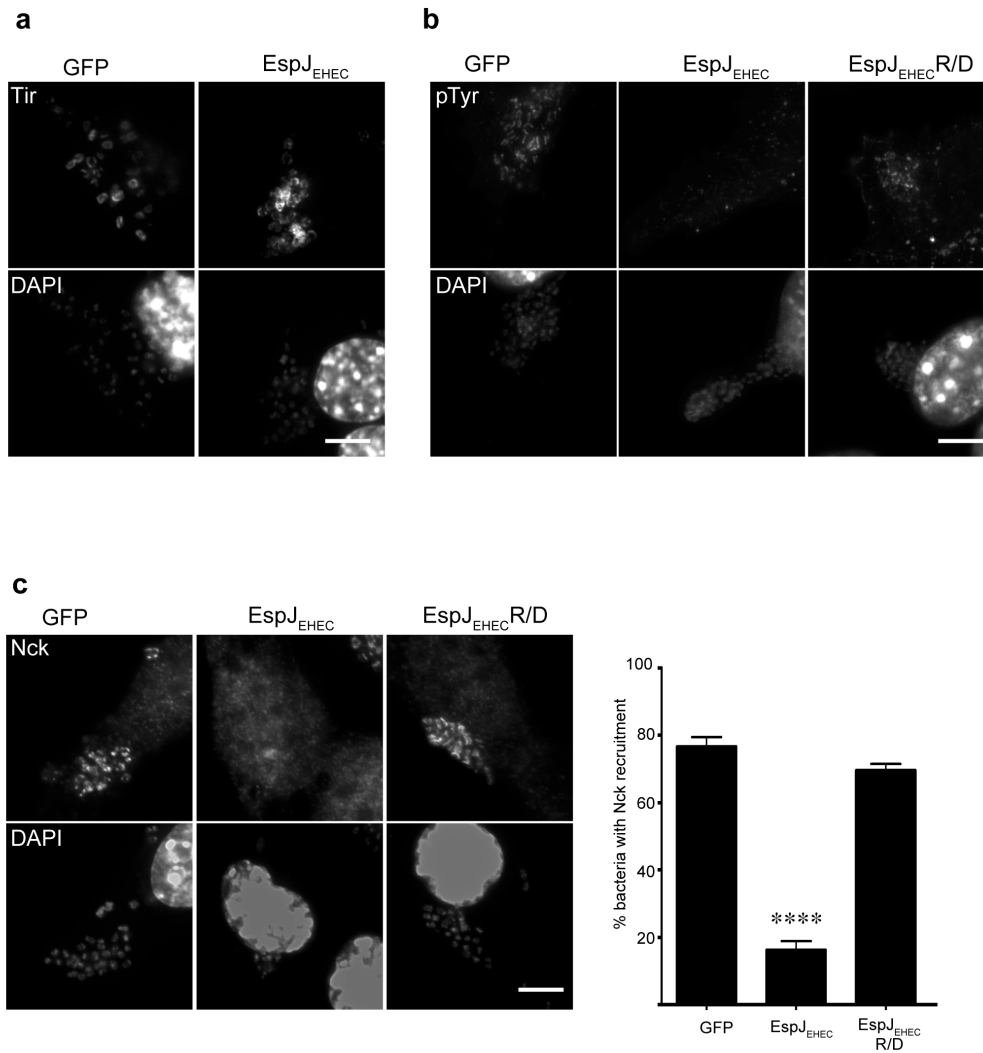

**Supplementary Figure 5. EspJ inhibits tyrosine phosphorylation and Nck recruitment to the EPEC attachment sites dependent on its ART domain.** Swiss 3T3 cells expressing Flag-tagged GFP, EspJ or EspJ-R/D were infected with EPEC E2348/69. Cells were stained with anti-Tir (a), anti-pTyr (b) or anti-Nck (c) and DAPI to visualize bacteria. Representative images are shown. Nck recruitment was quantified for bacteria attached to 50 transfected cells. Results are the mean  $\pm$  SD of three independent experiments. Data sets were analysed using one-way ANOVA (GraphPad Prism v6.0). A significant result is defined as  $p < 0.05$  (shown as \*,  $p < 0.01$  as \*\*,  $p < 0.001$  as \*\*\* and  $p < 0.0001$  as \*\*\*\*) as compared to GFP expressing cells. Scale bars indicate 10  $\mu\text{m}$ .

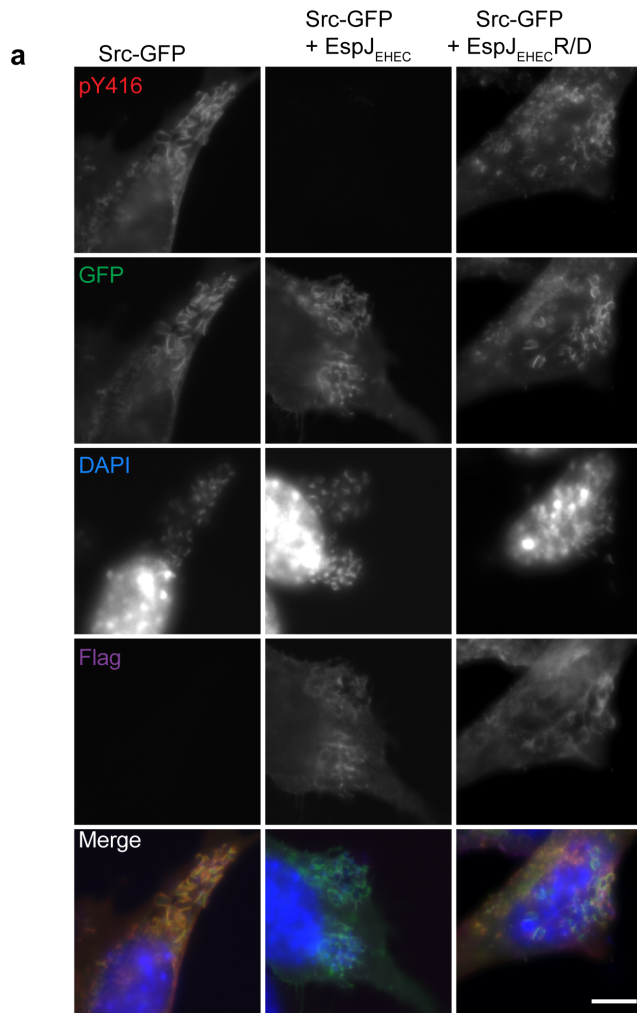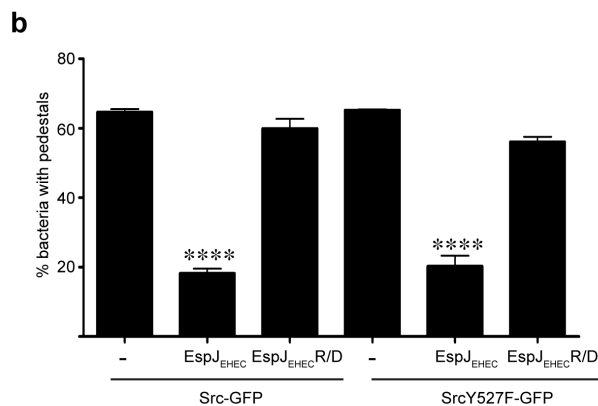

**Supplementary Figure 6. EspJ inhibits recruitment of active Src to sites of bacterial attachment.** (a) Swiss 3T3 cells were co-transfected with Src-GFP with an empty vector, Flag-tagged EspJ or EspJ-R/D and infected with EPEC. Immunofluorescent analysis with anti-pY416 (red), anti-Flag (purple) and DAPI (blue) revealed that although Src-GFP is recruited beneath EPEC attachment sites in all conditions, it is not activated in cells specifically expressing WT

EspJ. (b) Cells co-expressing Flag-tagged EspJ or EspJ-R/D, with Src-GFP or Src Y527F-GFP were infected with EPEC. Actin polymerization was quantified for bacteria attached to 50 transfected cells and was reduced by EspJ in cells expressing either wild type Src or constitutively active Src. Results are the mean  $\pm$  SD of three independent experiments in which 50 cells were analyzed. Data sets were analysed using one-way ANOVA (GraphPad Prism v6.0). A significant result is defined as  $p < 0.05$  (shown as \*,  $p < 0.01$  as \*\*,  $p < 0.001$  as \*\*\* and  $p < 0.0001$  as \*\*\*\*) as compared to GFP expressing cells. Scale bars indicate 10  $\mu\text{m}$ .



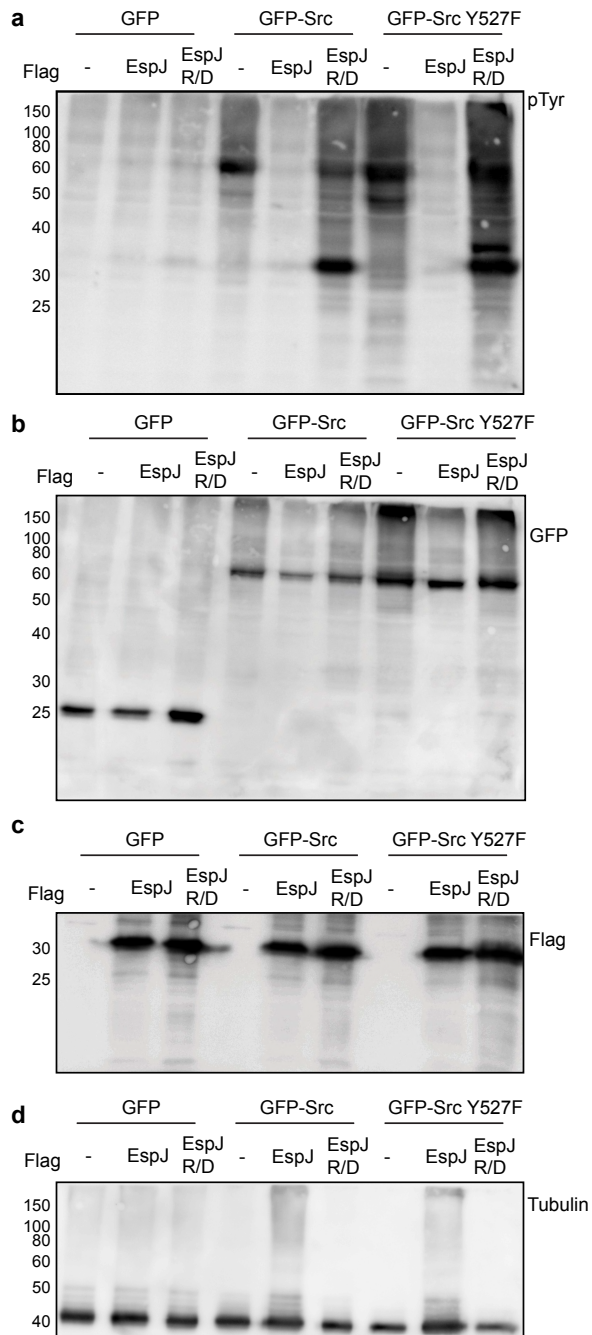

**Supplementary Figure 7. EspJ inhibits Src dependent phosphorylation.** Full immunoblots corresponding to cropped versions shown in Fig. 3d. Swiss 3T3 cells transfected with an empty vector or expressing Flag-tagged EspJ, or EspJ-R/D, were co-transfected with GFP, Src-GFP or Src Y527F-GFP and analyzed by anti-pTyr (a), anti-GFP (b), and anti-Flag (c) immunoblot. Anti-tubulin immunoblot shown as loading control (d). EspJ inhibited general protein tyrosine phosphorylation. Similar results were obtained in three independent experiments. Representative immunoblots are shown.

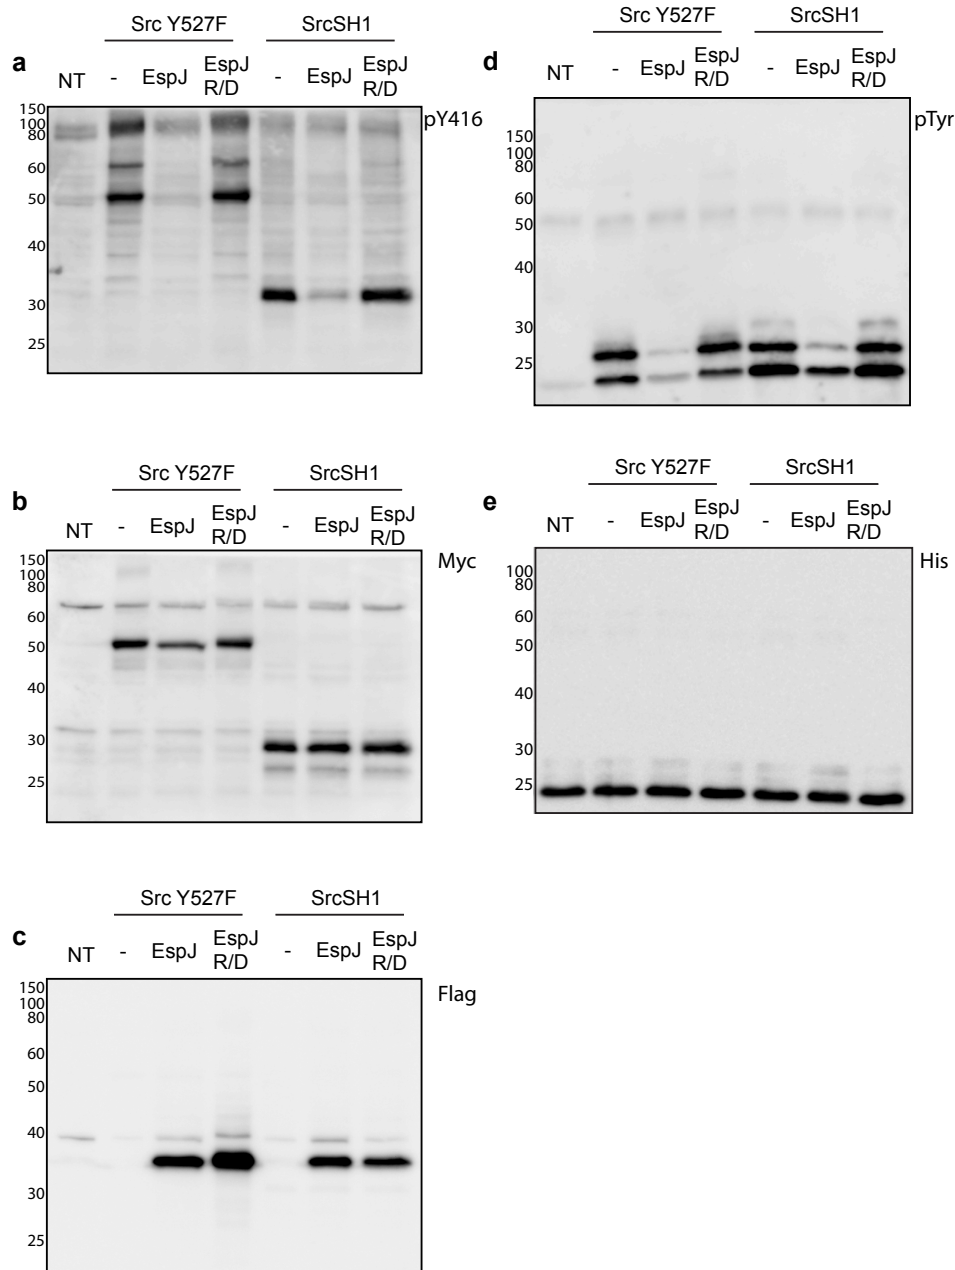

**Supplementary Figure 8. EspJ inhibits Src kinase activity.** Full immunoblots corresponding to cropped versions shown in Fig. 4a & b. Swiss 3T3 cells expressing myc-tagged Src Y527F or Src SH1 with Flag-tagged EspJ, or EspJ-R/D were analyzed by anti-pY416 (a), anti-Myc (b) and anti-Flag (c) antibodies. EspJ inhibited auto-phosphorylation (pY416) of both Src Y527F and Src SH1. Myc-tagged Src Y527F or Src SH1 were immunoprecipitated from lysates of cells expressing EspJ or EspJ and incubated with His-tagged TirC<sub>EPEC</sub>. Analysis by immunoblotting with anti-pTyr (d) and anti-His (e) antibodies indicated that Src Y527F and Src SH1 were inactive when immunoprecipitated from cells co-expressing EspJ. Similar results were obtained in three independent experiments.

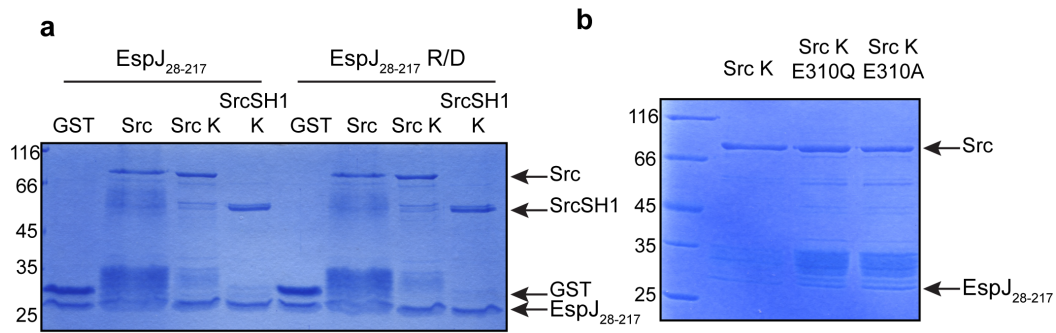

**Supplementary Figure 9. EspJ ADP-ribosylates Src and SrcSH1 but not Src E310A or E310Q.** Coomassie stained gels corresponding to the autoradiographs shown in Fig. 4c & d. (a) Recombinant EspJ and EspJ-R/D were incubated with GST, GST-Src, GST-Src K295M (Src K) or GST-SrcSH1 K295M (SrcSH1 K) and  $^{32}\text{P}$ -labeled  $\text{NAD}^+$ . (b) Recombinant EspJ was incubated with Src K295M, Src K295M/E310Q or Src K295M/E310A and  $^{32}\text{P}$ -labeled  $\text{NAD}^+$ . Arrows indicating positions of the purified proteins.

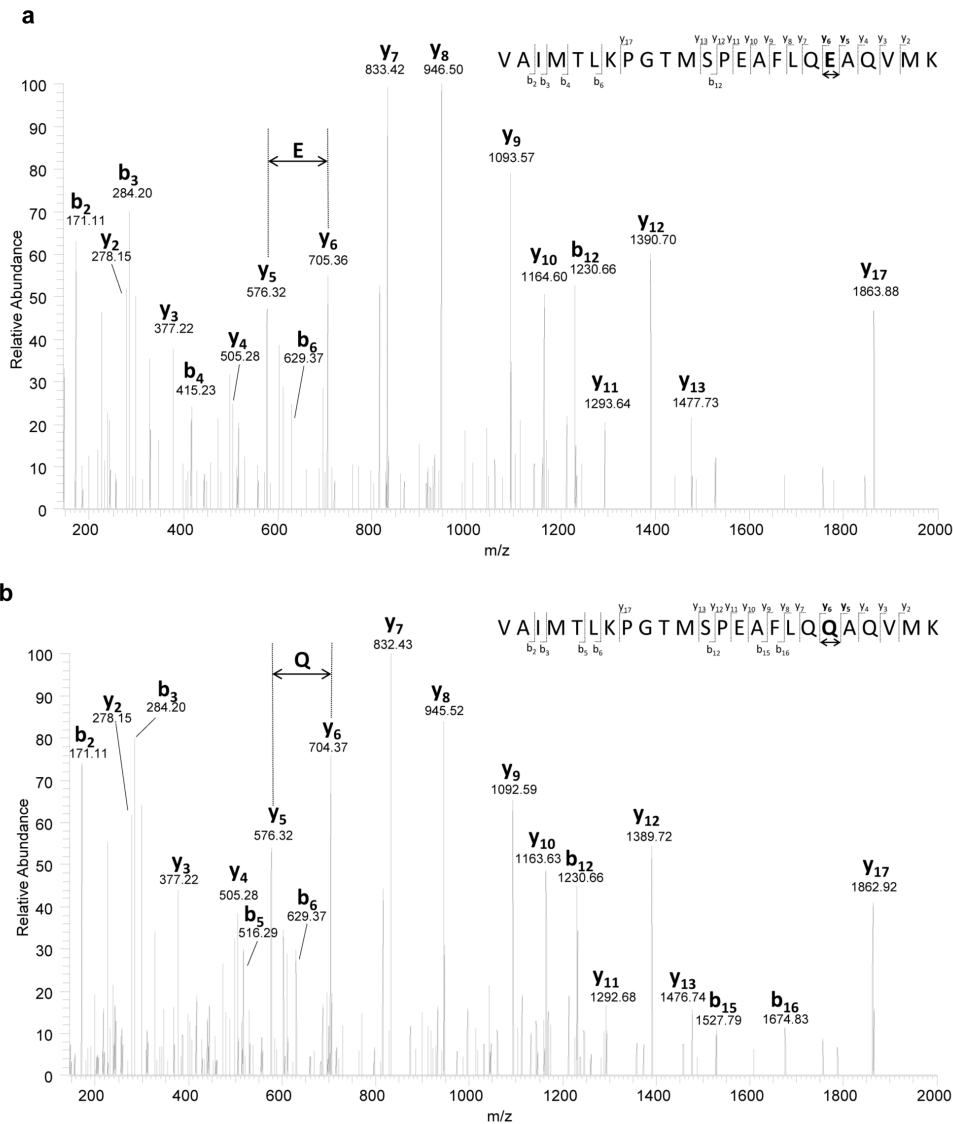

**Supplementary Figure 10. EspJ converts Src Glu310 to Gln** (a) HCD fragment ion spectrum of the precursor 874.1254 (3+). Database searching identified the tryptic peptide with the sequence VAIMTLKPGTMSPEAFLEAQMVK. The spectrum indicated a Glu residue was present at position 310 in SrcK295M. (b) HCD fragment ion spectrum of the precursor 873.7925 (3+). Database searching identified the tryptic peptide with the sequence VAIMTLKPGTMSPEAFLQQAQMVK. The spectrum indicated a Gln residue was present at position 310 in SrcK295M treated with EspJ.

```

Abl  ITMKHKLGGGQYGEVYEGVWKKY---SLTVAVKTLKEDTME---VEEFLKEAAVMKEIKH 54
Arg  ITMKHKLGGGQYGEVYEGVWKKY---SLTVAVKTLKEDTME---VEEFLKEAAVMKEIKH 54
Src  LRLEVKLGQGCFFGEVWMTWNG----TTRVAIKTLKPGTMS---PEAFLOEAQVMKKLRH 53
Yes  LRLEVKLGQGCFFGEVWMTWNG----TTKVAIKTLKPGTMM---PEAFLOEAQIMKKLRH 53
Fyn  LQLIKRLGNQGFFGEVWMTWNG----NTKVAIKTLKPGTMS---PESFLEEAQIMKKLRH 53
Lyn  IKLVKRLGAGQFFGEVWMTWNG----STKVAIKTLKPGTMS---VQAFLEEAANLMTLQH 53
FAK  IELGRCEIGEQFGDVHQGIYMSPEPALAVAIKTCNKTSDS-VREKFLQEALTRQFDH 59
Syk  TLEDKELGSGNFGTVKKGYQMKK-VVKTVAVKILKNEANDPALKDELLAEANVMQQLDN 59
      * * * * * * * * * * * * * * * * * * * * * * * * * * * * * * * *

Abl  PNLVQLLGVCTREPPFYIITEFMTYGNLLDYLRECNQEVNAVLLYMATQISSAMEYLE 114
Arg  PNLVQLLGVCTLEPPFYIVTEYMPYGNLLDYLRECNREEVTAVLLYMATQISSAMEYLE 114
Src  EKLVLQYAVVS-EEPIYIVTEYMSKGSLLDFLKGEGTKYLRLPQLVDMAAQIASGMAYVE 112
Yes  DKLVLPLYAVVS-EEPIYIVTEFMSKGSLLDFLKEGDKYLLKLPQLVDMAAQIADGMAYIE 112
Fyn  DKLVLQYAVVS-EEPIYIVTEYMNKGSLLDFLKDGEGRALKLPNLVDMAAQVAAGMAYIE 112
Lyn  DKLVRLLYAVVTRPEPIYIITEYMAKGSLLDFLKSDEGGKVLPLKLDLDFSAQIAEGMAYIE 113
FAK  PHIVKLVIGVIT-ENPVWIIMELCTLGELRSFLQVRKYS-LDLASLILYAYQLSTALAYLE 117
Syk  PYIVRMIGICE-AESWMLVMEALGPLNKYLQ--QNRHVKDKNIIELVHQVSMGMKYLE 116
      * : : . : * * * * * : : : * : : * : : * : : * : : * : :

Abl  KKNFIHRDLAARNCLVGENHLVKVADFGLSRLMTGDT--YTAHAGAKFPFIKWTAPESLAY 172
Arg  KKNFIHRDLAARNCLVGENHVVKVADFGLSRLMTGDT--YTAHAGAKFPFIKWTAPESLAY 172
Src  RMNYVHRDLRAANILVGENLVCKVADFGLARLIEDNE--YTARQGAQFPFIKWTAPEAALY 170
Yes  RMNYIHRDLRAANILVGENLVCKIADFGLARLIEDNE--YTARQGAQFPFIKWTAPEAALY 170
Fyn  RMNYIHRDLRSANILVGNGLICKIADFGLARLIEDNE--YTARQGAQFPFIKWTAPEAALY 170
Lyn  RKNYIHRDLRAANVLVSESLMCKIADFGLARVIEDNE--YTAREGAKFPFIKWTAPEAINF 171
FAK  SKRFVHRDIAARNVLVSSNDCVKLGDVGLSRYMEDST--YYKASKGKLPIKWMAPESINF 175
Syk  ESNFVHRDLAARNVLLVTQHYAKISDFGLSKALRADENYYKAQTHGKWPVKWYAPECINY 176
      . : : * * : * * * * * : : * * * * * * * * * * * * * * * * *

Abl  NKFSIKSDVWAFGVLLEIATYGMSPYPGIDLSQVYELLEKDYRMRPEGCPPEKVVYELMR 232
Arg  NTFSIKSDVWAFGVLLEIATYGMSPYPGIDLSQVYDLEKGYRMEQPEGCPPEKVVYELMR 232
Src  GRFTIKSDVWSFGILLTELTTKGRVPYPMVNRVLDQVERGYRMPCPPECPESLHDLMC 230
Yes  GRFTIKSDVWSFGILQTELVTKGRVPYPMVNRVLEQVERGYRMPCPQGCPELHELMLN 230
Fyn  GRFTIKSDVWSFGILLTELVTKGRVPYPMNREVLEQVERGYRMPCPQDCPISLHELMI 230
Lyn  GCFTIKSDVWSFGILLYEIVTYGKIPYGRTNADVMTALSQGYRMPRVENCPELDYDIMK 231
FAK  RRFTSASDVWFMFVCMWEILMHGKPFQGVKNDVIGRIENGERLPMPPNCPPTLYSLMT 235
Syk  YKFSSKSDVWSFGVLMWEAFSYGQKPYRGMKGEVTVAMLEKGERMGCPAGCPREMYDLMN 236
      * : * * * * * * * * * * * * * * * * * * * * * * * * * * * * *

Abl  ACWQWNPSDRPSFAEIQAF----- 252
Arg  ACKWSPADRPSFAETHQAF----- 252
Src  QCWRKEPEERPTFEYLQAFLEDYF- 254
Yes  LCWKKDPDERPTFEYIQSFLEDYF- 254
Fyn  HCWKKDPEERPTFEYLQSFLEDYF- 254
Lyn  MCWKEKAERPTFDYLSVLDYF- 255
FAK  KCWAYDPSRRPRFTELKQLSTIL- 259
Syk  LCWTDYDVENRPGFAAVELRLRNYYY 261
      * * . * * * . :

```

**Supplementary Figure 11. Alignment of the catalytic domain of tyrosine kinases.** SH1 domain of Src (P12931,270-523), Fyn (P0624, 271-524), Yes (P07947, 277-530), Lyn (P07948, 247-501), Abl1 (P00519, 242-493), Arg (P42684, 288-539), Syk (P43405,371-631), and Fak1 (Q05397, 422-680) tyrosine kinases from *Homo sapiens*. Residues equivalent to Src (chicken) E310 are shown in bold and black showing the residue targeted by EspJ is conserved. Amino acid color code: Red: small, hydrophobic, aromatic, not Y; Blue: acidic; Magenta: basic; Green: hydroxyl, amine, amide, basic; "\*": identical; ":": conserved substitutions (same colour group); ".": semi-conserved substitution (similar shapes).

## Supplementary Tables 1-4

**Supplementary Table 1.** List of bacterial strains.

| ICC No. | Name                | Description                                                                                                  | Source/Ref |
|---------|---------------------|--------------------------------------------------------------------------------------------------------------|------------|
|         | BL21 (DE3)          | <i>E. coli</i> F <sup>-</sup> <i>ompT hsdSB</i> (rB <sup>-</sup> , mB <sup>-</sup> )<br><i>gal dcm</i> (DE3) | Invitrogen |
| ICC481  | E2348/69            | EPEC O127:H6                                                                                                 | 1          |
| ICC715  | E2348/69 pTccP      | E2348/69 carrying pSA10-tccP                                                                                 | 2          |
|         | JPN15               | Plasmid (EAF) cured derivative<br>O127:H6 E2348/69                                                           | 3          |
| ICC263  | JPN15 $\Delta espJ$ | JPN15 <i>espJ</i> deletion mutant                                                                            | This study |
| ICC608  | 85-170              | EHEC O157:H7 spontaneous <i>stx1-</i><br><i>stx2-</i> , NalR                                                 | 4          |

**Supplementary Table 2.** List of oligonucleotides. Restriction sites shown in bold and mutated bases underlined.

| Name                                     | oligonucleotide sequence 5'-3'                                                              |
|------------------------------------------|---------------------------------------------------------------------------------------------|
| pKD4_espJ <sub>EPEC</sub> F              | ccaatcataaagaactgcttatcatcaattagtaacatattacgcaacgagt<br>gtaggctggagctgcttc                  |
| pKD4_espJ <sub>EPEC</sub> R              | catccagcctgactgtttctggaagtgaataatgaatggttctccagtc<br>atgaatatcctccttag                      |
| pET28a_NdeI espJ28-217 <sub>EPEC</sub> F | gatcat <b>catatgg</b> agcaaacaggaaaactgttaaac                                               |
| pET28a_espJ <sub>EPEC</sub> HindIII R    | aata <b>agcttt</b> catttttgagtgggtggatattaac                                                |
| pGEX-KG_BamHI src F                      | gt <b>ggatcc</b> atggggagcagcaagagc                                                         |
| pGEX-KG_BamHI src250 F                   | gt <b>ggatcccc</b> acagaccagggactcgc                                                        |
| pGEX-KG_src EcoRI R                      | tc <b>gaattc</b> tataggttctctccaggctgg                                                      |
| pSA10_EcoRI espJ <sub>EPEC</sub> F       | <b>cagaattc</b> atgccaatcataaagaactgcttat                                                   |
| pSA10_espJ <sub>EPEC</sub> PstI R        | ttgtcgaagctt <b>gctgcag</b> ctaagcgtagtctgggacgtcatatgggtat<br>gctcctttttgagtgggtggatattaac |
| pRK5_espJ <sub>EPEC</sub> BamHI F        | ct <b>ggatcc</b> atgccaatcataaagaactgcttatc                                                 |
| pRK5_espJ <sub>EPEC</sub> PstI R         | tggcggccaagctt <b>ctgcag</b> tcatttttgagtgggtggatattaac                                     |
| SDM_espJ <sub>EPEC</sub> R79A F          | cgggattcgtgctgtag <b>caat</b> ccaagtaatcag                                                  |
| SDM_espJ <sub>EPEC</sub> D187A F         | ggagccaaagtatatccagctatatcatgctctctgaga                                                     |
| SDM_espJ <sub>EHEC</sub> opt R79A F      | ggacttcgtggccgtggccatccagaacaatcagttcacc                                                    |
| SDM_espJ <sub>EHEC</sub> opt D187A F     | gccaaaggtgtacccgccaccagctgctcctg                                                            |
| pEGFP-N1_EcoRI src F                     | gt <b>gaattc</b> atggggagcagcaagagc                                                         |
| pEGFP-N1_EcoRI src250 F                  | gt <b>gaattc</b> atgccacagaccaggactcg                                                       |
| pEGFP-N1_src-myc-BamHI R                 | atggatccctacaggtcctcctcggagatcagcttctgctccgagccgga<br>gcctaggttctctccaggc                   |
| SDM_src E310A F                          | ggaggccttctgcag <b>gcag</b> cccaagtgatgaag                                                  |
| SDM_src E310Q F                          | ggaggccttctgcag <b>caag</b> cccaagtgatgaag                                                  |

**Supplementary Table 3.** List of plasmids.

| pICC No. | Name                                   | Description                                                                           | Source          |
|----------|----------------------------------------|---------------------------------------------------------------------------------------|-----------------|
| pICC853  | pET28a                                 | Bacterial expression vector with N-terminal 6xHis tag                                 | Invitrogen      |
| pICC1611 | pET28a-espJ                            | pET28a derivative encoding EspJ <sub>EPEC</sub>                                       | This study      |
| pICC1612 | pET28a-espJ R79A                       | pET28a derivative encoding EspJ <sub>EPEC</sub> R79A                                  | This study      |
| pICC1613 | pET28a-espJ D187A                      | pET28a derivative encoding EspJ <sub>EPEC</sub> D187A                                 | This study      |
| pICC1614 | pET28a-espJ R79A/D187A                 | pET28a derivative encoding EspJ <sub>EPEC</sub> R79A/D187A                            | This study      |
| pICC609  | pET28a-tir <sub>C<sub>EPEC</sub></sub> | pET28a derivative encoding carboxy terminus (residues 369–550) of Tir <sub>EPEC</sub> | 5               |
|          | pGEX-KG                                | Bacterial expression vector as GST fusion protein                                     | 6               |
| pICC1615 | pGEX-KG-src                            | pGEX-KG derivative encoding Src (chicken)                                             | This study      |
| pICC1616 | pGEX-KG-src K295M                      | pGEX-KG derivative encoding kinase dead Src (chicken)                                 | This study      |
| pICC1617 | pGEX-KG-srcSH1 K295M                   | pGEX-KG derivative encoding kinase dead Src 250-533                                   | This study      |
| pICC1633 | pGEX-KG-src K295M/E310Q                | pGEX-KG derivative encoding kinase dead Src and E310Q                                 | This study      |
| pICC1634 | pGEX-KG-src K295M/E310A                | pGEX-KG derivative encoding kinase dead Src and E310A                                 | This study      |
| pICC1223 | pACYC-GFP                              | pACYC184 derivative encoding GFP                                                      | Olivier Marches |
|          | pSA10                                  | pKK17.1 containing <i>lacI gene</i>                                                   | 1               |
| pICC1618 | pSA10-espJ                             | pSA10 derivative encoding EspJ <sub>EPEC</sub>                                        | This study      |
| pICC1619 | pSA10-espJ C7A                         | pSA10 derivative encoding EspJ <sub>EPEC</sub> C7A                                    | This study      |
| pICC1620 | pSA10-espJ R79A                        | pSA10 derivative encoding EspJ <sub>EPEC</sub> R79A                                   | This study      |
| pICC1621 | pSA10-espJ D187A                       | pSA10 derivative encoding EspJ <sub>EPEC</sub> D187A                                  | This study      |
| pICC1622 | pSA10-espJ R79A/D187A                  | pSA10 derivative encoding EspJ <sub>EPEC</sub> R79A D187A                             | This study      |
| pICC281  | pSA10-tccP                             | pSA10 derivative encoding TccP                                                        | 2               |



|          |                                            |                                                                                                                                   |            |
|----------|--------------------------------------------|-----------------------------------------------------------------------------------------------------------------------------------|------------|
|          | pEGFP-FcγRIIa                              | GFP-tagged FcRIIa for expression in mammalian cells                                                                               | 7          |
|          | pEGFP-FcγRIIa Y282F/Y298F                  | pEGFP-FcγRIIa derivative with Y282F/Y298F mutations                                                                               | 7          |
|          | pRK5                                       | N-terminal myc-tag mammalian expression vector                                                                                    | Clontech   |
| pICC1623 | pRK5-espJ                                  | pRK5 derivative encoding myc-tagged EspJ <sub>EPEC</sub> for expression in mammalian cells                                        | This study |
| pICC1624 | pRK5-espJ R79A/D187A                       | pRK5 derivative encoding myc-tagged EspJ <sub>EPEC</sub> R79A D187A for expression in mammalian cells                             | This study |
| pICC1625 | pcDNA-NTAP                                 | pcDNA3.1 derivative for expression in mammalian cells with TAP-tag (3xFLAG-tag - TEV cleavage site – calmodulin binding peptide). | This study |
| pICC569  | pcDNA-NTAP-GFP                             | pcDNA-NTAP derivative encoding TAP-tagged eGFP in pcDNA3.1(+)                                                                     | 8          |
| pICC1626 | pcDNA-NTAP-espJ <sub>EPEC</sub>            | pcDNA-NTAP derivative encoding codon optimized EspJ <sub>EPEC</sub>                                                               | This study |
| pICC1627 | pcDNA-NTAP-espJ <sub>EPEC</sub> R79A/D187A | pcDNA-NTAP derivative encoding codon optimized EspJ <sub>EPEC</sub> R79A D187A                                                    | This study |
| pICC1628 | pcDNA-NTAP-espJ <sub>EHEC</sub>            | pcDNA-NTAP derivative encoding codon optimized EspJ <sub>EHEC</sub>                                                               | This study |
| pICC1629 | pcDNA-NTAP-espJ <sub>EHEC</sub> R79A/D187A | pcDNA-NTAP derivative encoding codon optimized EspJ <sub>EHEC</sub> R79A D187A                                                    | This study |
|          | pCB6-Src-GFP                               | GFP-tagged Src for expression in mammalian cells                                                                                  | 9          |
|          | pCB6-Src Y527F-GFP                         | GFP-tagged constitutively active Src Y527F for expression in mammalian cells                                                      | 9          |
| pICC1630 | pEGFP-Src-myc                              | pEGFP-N1 derivative encoding myc-tagged Src                                                                                       | This study |
| pICC1631 | pEGFP-Src Y527F-myc                        | pEGFP-N1 derivative encoding myc-tagged Src Y527F                                                                                 | This study |
| pICC1632 | pEGFP-Src SH1-myc                          | pEGFP-N1 derivative encoding myc-tagged Src 250-533                                                                               | This study |

**Supplementary Table 4:** ADP-ribosylated peptides identified by database searching with Mascot. All peptides have been mapped exclusively to the sequence of Src-K295M/E310Q.

| sequence                   | # methionine oxidations | Mascot PTM site probability [%] | m/z exp   | Mr exp (Da) | $\Delta m$ (ppm) | Mascot Score | fragmentation mode | protease    | position |
|----------------------------|-------------------------|---------------------------------|-----------|-------------|------------------|--------------|--------------------|-------------|----------|
| VAIMTLKPGTMSPEAFLQQAQVMK   | 0                       | 51                              | 1054.1484 | 3159.4234   | -0.36            | 31           | HCD                | trypsin     | 292-315  |
| VAIMTLKPGTMSPEAFLQQAQVMK K | 0                       | 55                              | 1096.8455 | 3287.5147   | -1.46            | 45           | HCD                | trypsin     | 292-316  |
| VAIMTLKPGTMSPEAFLQQAQVMK K | 1                       | 21                              | 1102.1776 | 3303.511    | -1.03            | 19           | HCD                | trypsin     | 292-316  |
| VAIMTLKPGTMSPEAFLQQAQVMK   | 0                       | 74                              | 790.8618  | 3159.4182   | -1.99            | 63           | ETD                | trypsin     | 292-315  |
| VAIMTLKPGTMSPEAFLQQAQVMK   | 1                       | 20                              | 794.8588  | 3175.4062   | -4.18            | 15           | ETD                | trypsin     | 292-315  |
| VAIMTLKPGTMSPEAFLQQAQVMK K | 0                       | 36                              | 822.8862  | 3287.5158   | -1.11            | 28           | ETD                | trypsin     | 292-316  |
| KPGTMSPEAFLQQA             | 0                       | 69                              | 1023.4071 | 2044.7996   | -0.3             | 20           | HCD                | elastase    | 298-311  |
| KPGTMSPEAFLQQAQVM          | 0                       | 44                              | 1202.4902 | 2402.9658   | -0.79            | 33           | HCD                | elastase    | 298-314  |
| LQQAQVMKK                  | 0                       | 50                              | 538.8948  | 1613.6626   | -2.99            | 36           | ETD                | thermolysin | 308-316  |
| LQQAQVMKK                  | 1                       | 50                              | 544.2282  | 1629.6627   | 0.23             | 34           | ETD                | thermolysin | 308-316  |
| VAIMTLKPGTMSPEAFLQQAQVMK   | 0                       | 33                              | 1054.1474 | 3159.4204   | -1.31            | 21           | HCD                | trypsin     | 292-315  |
| VAIMTLKPGTMSPEAFLQQAQVMK   | 1                       | 22                              | 1059.48   | 3175.4182   | -0.4             | 19           | HCD                | trypsin     | 292-315  |
| VAIMTLKPGTMSPEAFLQQAQVMK   | 2                       | 29                              | 1064.8114 | 3191.4124   | -0.62            | 22           | HCD                | trypsin     | 292-315  |
| VAIMTLKPGTMSPEAFLQQAQVMK K | 0                       | 26                              | 1096.8463 | 3287.5171   | -0.73            | 21           | HCD                | trypsin     | 292-316  |
| VAIMTLKPGTMSPEAFLQQAQVMK K | 1                       | 21                              | 1102.1786 | 3303.514    | -0.13            | 20           | HCD                | trypsin     | 292-316  |

|                                            |   |    |           |           |        |     |     |             |         |
|--------------------------------------------|---|----|-----------|-----------|--------|-----|-----|-------------|---------|
| VAIMTLKPGTMSPEAF <u><b>L</b></u> QQAQVMK   | 0 | 96 | 790.8646  | 3159.4295 | 1.56   | 115 | ETD | trypsin     | 292-315 |
| VAIMTLKPGTMSPEAF <u><b>L</b></u> QQAQVMK   | 1 | 60 | 794.8641  | 3175.4273 | 2.49   | 36  | ETD | trypsin     | 292-315 |
| VAIMTLKPGTMSPEAF <u><b>L</b></u> QQAQVMK   | 1 | 32 | 826.8859  | 3303.5145 | 0.032  | 29  | ETD | trypsin     | 292-315 |
| AIMTLKPGTMSPEAF <u><b>L</b></u> QQA        | 0 | 50 | 859.0386  | 2574.0939 | 0.099  | 31  | HCD | elastase    | 293-311 |
| TLKPGTMSPEAF <u><b>L</b></u> QQA           | 0 | 84 | 1130.4729 | 2258.9312 | -0.34  | 35  | HCD | elastase    | 296-311 |
| LKPGTMSPEAF <u><b>L</b></u> QQAQVM         | 0 | 76 | 839.692   | 2516.0541 | 0.93   | 33  | HCD | elastase    | 297-314 |
| KPGTMSPEAF <u><b>L</b></u> QQA             | 0 | 91 | 682.6078  | 2044.8016 | 0.66   | 29  | HCD | elastase    | 298-311 |
| KPGTMSPEAF <u><b>L</b></u> QQAQVM          | 0 | 40 | 1202.4913 | 2402.968  | 0.13   | 20  | HCD | elastase    | 298-314 |
| KPGTMSPEAF <u><b>L</b></u> QQAQVMKCLRHEKLV | 0 | 42 | 707.9456  | 3534.6917 | -0.025 | 32  | ETD | elastase    | 298-323 |
| LKPGTMSPEAF <u><b>L</b></u> QQAQ           | 0 | 45 | 762.9872  | 2285.9398 | -1.37  | 32  | HCD | thermolysin | 297-312 |
| L <u><b>Q</b></u> QAQVMKK                  | 0 | 62 | 538.8951  | 1613.6634 | -2.48  | 32  | ETD | thermolysin | 308-316 |
| L <u><b>Q</b></u> QAQVMKK                  | 1 | 50 | 544.2277  | 1629.6612 | -0.65  | 36  | ETD | thermolysin | 308-316 |

**Supplementary Table 4: Summary of all ADP-ribosylated peptides identified by database searching with Mascot with a Mascot Score higher than 15.** Modified amino acids (methionine oxidation and ADP-ribosylation) are marked in bold and are underscored; the Mascot PTM site probabilities for these PTM positional isomers are given. All peptides match to the same region of Src-K298M/E310Q; only position 308-311 is covered by all overlapping peptides. Two peptides allow unambiguous localization of the ADP-ribosylation site to position 310 (gray lines, Mascot PTM site probability > 90%). The HCD fragment ion spectrum of the ADP-ribosylated peptide with the sequence KPGTMSPEAF**L**QQA is shown in Figure 4E.

## Supplementary references

- 1 Levine, M. *et al.*, Escherichia coli strains that cause diarrhoea but do not produce heat-labile or heat-stable enterotoxins and are non-invasive. *Lancet*. 1 (8074), 1119-1122 (1978).
- 2 Garmendia, J. *et al.*, TccP is an enterohaemorrhagic Escherichia coli O157:H7 type III effector protein that couples Tir to the actin-cytoskeleton. *Cell Microbiol* 6 (12), 1167-1183 (2004).
- 3 Jerse, A.E., Yu, J., Tall, B.D., & Kaper, J.B., A genetic locus of enteropathogenic Escherichia coli necessary for the production of attaching and effacing lesions on tissue culture cells. *Proc Natl Acad Sci U S A* 87 (20), 7839-7843 (1990).
- 4 Tzipori, S. *et al.*, Role of a 60-megadalton plasmid and Shiga-like toxins in the pathogenesis of infection caused by enterohemorrhagic Escherichia coli O157:H7 in gnotobiotic piglets. *Infect Immun* 55 (12), 3117-3125 (1987).
- 5 Munera, D. *et al.*, Recruitment and membrane interactions of host cell proteins during attachment of enteropathogenic and enterohaemorrhagic Escherichia coli. *Biochem J* 445 (3), 383-392 (2012).
- 6 Guan, K.L. & Dixon, J.E., Eukaryotic proteins expressed in Escherichia coli: an improved thrombin cleavage and purification procedure of fusion proteins with glutathione S-transferase. *Anal Biochem* 192 (2), 262-267 (1991).
- 7 Tollis, S., Dart, A.E., Tzircotis, G., & Endres, R.G., The zipper mechanism in phagocytosis: energetic requirements and variability in phagocytic cup shape. *BMC Syst Biol* 4, 149 (2010).
- 8 Clements, A. *et al.*, EspG of enteropathogenic and enterohemorrhagic E. coli binds the Golgi matrix protein GM130 and disrupts the Golgi structure and function. *Cell Microbiol* 13 (9), 1429-1439 (2011).
- 9 Newsome, T.P., Weisswange, I., Frischknecht, F., & Way, M., Abl collaborates with Src family kinases to stimulate actin-based motility of vaccinia virus. *Cell Microbiol* 8 (2), 233-241 (2006).
